# Supplementary material
Source: PubMed Central journal article supplement (PMC2190615)
Supplement: blood_blood-2007-05-091256_1.pdf [file blood_blood-2007-05-091256_1.pdf]

| Name                                                        | Position (kb)* | Forward primer                    | Reverse primer                  |
|-------------------------------------------------------------|----------------|-----------------------------------|---------------------------------|
| <b>Primers in the human <math>\beta</math>-globin locus</b> |                |                                   |                                 |
| 5'HS7                                                       | -34.50         | 5'-CAGCA TGGCA AGTTG AAGAA-3'     | 5'-AGGGA TGCAA AAATG ACTGG-3'   |
| HOR 5'- $\beta$ 1 gene                                      | -32.21         | 5'-TCTAG GGAAA GGCCT TGTGA-3'     | 5'-GGTTT TGCAG GTGGA GAAGA-3'   |
| 5'HS6                                                       | -27.97         | 5'-CACGC CGTTC CCTTT ATCTA-3'     | 5'-CCAGC TGTTT AACTG TGGTA A-3' |
| 5'HS5 CTCF Site                                             | -21.76         | 5'-GCTGA AGCTG CTGTT ATGAC C-3'   | 5'-CCAGA TGTCC TGTCC CTGTA A-3' |
| 5'HS5 region                                                | -21.31         | 5'-TTCCT TCTAC CCTCC CCATT-3'     | 5'-ACTGA AAGGG CTCAT GCAAC-3'   |
| 5'HS5 region                                                | -19.96         | 5'-AGACA AGGAC TTGCC TGGTG-3'     | 5'-AGGAC CGGAC TGAAA GTGTG-3'   |
| 5'HS4                                                       | -18.39         | 5'-TGCCC TGCCT CTCTA CTAGG-3'     | 5'-ATGGG AGGGA GAGTC TCTGG-3'   |
| HS4/3                                                       | -16.71         | 5'-CCAGT CTCTG CTTCC AAAGG-3'     | 5'-TCAGG GATGT TAGGC TCAGG-3'   |
| 5'HS3 upstream                                              | -16.09         | 5'-CCCCA TCATA TGCAC AACAA-3'     | 5'-TTCAC AAAGC CCCAG ATTTT-3'   |
| 5'HS3 core                                                  | -14.87         | 5'-AGGGC CCAGA TGGGT TATAG-3'     | 5'-TAGGG GAGCA GTCCC ATGTA-3'   |
| 5'HS3 core 3'                                               | -14.66         | 5'-GGCAA GTGCC TTGAC TCCTA-3'     | 5'-TCTTC TGGAA CTTGC CTGCT-3'   |
| 5'HS3 downstream                                            | -13.14         | 5'-AGCCA CAGTT GCAGA CCATA-3'     | 5'-CCAAG GGGTC AAAGG CTAAT-3'   |
| HS3/2                                                       | -12.95         | 5'-ATTAC CCTTT GACCC CTTGG-3'     | 5'-TTAGG GCCCT CAGTT CTTGA-3'   |
| 5'HS2 core                                                  | -10.94         | 5'-CCATA GTCCA AGCAT GAGCA-3'     | 5'-CTGGG GACCC AGATA GGAGT-3'   |
| HS2.1                                                       | -9.81          | 5'-ACCCA TTACA GGACC TCACG-3'     | 5'-GCGAA ACCAA GTAGG CTGAC-3'   |
| HS2.1                                                       | -7.68          | 5'-CCTTC ACCGA ATCTC ATCCT-3'     | 5'-ATGGC AGGAA AGTCC TCACT-3'   |
| 5'HS1                                                       | -5.89          | 5'-CCCCT AAGCT CCCAG AAAAC-3'     | 5'-GGCTA AGGCA TCTGT GAAGG-3'   |
| $\epsilon$ gene-5' ~ 3.7 kb                                 | -3.62          | 5'-CCTGG ATGGC CATAA CACTT-3'     | 5'-CTGCG GGCAG TCTCA TTATT-3'   |
| $\epsilon$ gene promoter                                    | -0.15          | 5'-GTCCA TCCAT CACTG CTGAC-3'     | 5'-GGCCT GAGAG CTTGC TAGTG-3'   |
| $\epsilon$ gene-3' ~1kb                                     | +2.56          | 5'-TGGTT CAAAC CCAAG AGGAG-3'     | 5'-AGGGT CAAGT GCATG GTTTC-3'   |
| between $\epsilon$ & $\gamma$                               | +7.82          | 5'-CATGC CTCCA GCTTT GTTCT-3'     | 5'-GGCCA TACTG CCCAA AGTAA-3'   |
| $\gamma$ gene-5' ~1.0kb                                     | +13.78         | 5'-CCAAG GTCAT GGATC GAGTT-3'     | 5'-ACACT GTGC AGCTG GGATG-3'    |
| $\gamma$ -CAC/CAT Box <sup>1</sup>                          | +14.79         | 5'-CCCTT CCCCA CACTA TCTCA-3'     | 5'-CCTGG CCTCA CTGGA TACTC-3'   |
| $\gamma$ -Promoter                                          | +14.83         | 5'-AAACG GTCCC TGGCT AAAC-3'      | 5'-GCTGA AGGGT GCTTC CTTTT-3'   |
| $\gamma$ -TATA Box <sup>1,2</sup>                           | +14.94         | 5'-GGCTG GCTAG GGATG AAGA-3'      | 5'-GGCGT CTGGA CTAGG AGCTT-3'   |
| $\gamma$ -5' ~1.2kb                                         | +18.69         | 5'-TCCGA TAAGC CAGAA TTCCA-3'     | 5'-TGGAC CATTG ACTGG GTAGG A-3' |
| $\gamma$ -CAC/CAT Box <sup>1</sup>                          | +19.72         | 5'-CCCTT CCCCA CACTA TCTCA-3'     | 5'-CCTGG CCTCA CTGGA TACTC-3'   |
| $\gamma$ -Promoter                                          | +19.76         | 5'-AAACG GTCCC TGGCT AAAC-3'      | 5'-GCTGA AGGGT GCTTC CTTTT-3'   |
| $\gamma$ -TATA Box <sup>1,2</sup>                           | +19.88         | 5'-GGCTG GCTAG GGATG AAGA-3'      | 5'-GGCGT CTGGA CTAGG AGCTT-3'   |
| $\gamma$ -Exon-1                                            | +19.98         | 5'-GCCAT GGGTC ATTTT ACAG-3'      | 5'-TGGTC ACCAG AGCCT ACCTT-3'   |
| $\gamma$ -Exon-2                                            | +20.22         | 5'-CCCAG AGGTT CTTTG ACAGC-3'     | 5'-TTCTC AGGAT CCACA TGCAG-3'   |
| $\gamma$ -Intron-2                                          | +20.93         | 5'-TATGT CCAGG GGTGA GGAAC-3'     | 5'-GTTGT TCCCC TTCAA GCACT-3'   |
| $\gamma$ -Exon-3                                            | +21.29         | 5'-AAATG TGCTG GTGAC CGTTT-3'     | 5'-TCTGA ATCAT GGGCA AGAGG-3'   |
| $\gamma$ -3' ~0.2 kb                                        | +21.59         | 5'-GCCTG TTTGT GTTTG TGGTG-3'     | 5'-GTCTT TCTTC CCACC GGATT-3'   |
| $\gamma$ -3' ~ 2.7 kb                                       | +24.20         | 5'-GAGCG GGTGA GAGAA AAGTG-3'     | 5'-GCCTC AGAGG AAAC TCAAG-3'    |
| $\delta$ -5' ~ 2.5 kb                                       | +32.84         | 5'-TGTA A CCAGA TCTCC CAATG TG-3' | 5'-GAATG TGTTT GTGAG GGAGG A-3' |
| $\delta$ gene promoter                                      | +35.05         | 5'-TGCAG AGGAG AACAG GGTTT-3'     | 5'-CTGCC TTTA TGCTG GTCCT-3'    |
| $\beta$ gene-5' ~ 2.6 kb                                    | +40.05         | 5'-TGTGG CATCC ATTCA CAGAG-3'     | 5'-TGGTC AGAGC CTCAG TTTCA-3'   |
| $\beta$ gene promoter                                       | +42.46         | 5'-GAGGG CTGAG GGTTC GAAGT-3'     | 5'-TAGAT GGCTC TGCCC TGAAT-3'   |
| $\beta$ gene exon1                                          | +42.68         | 5'-GCAAC CTCAA ACAGA CACCA-3'     | 5'-CTCAC CACCA ACTTC ATCCA-3'   |
| $\beta$ gene exon2                                          | +42.96         | 5'-TTGAG TCCTT TGGGG ATCTG-3'     | 5'-AGCTC ACTCA GTGTG GCAAA-3'   |
| $\beta$ gene intron2                                        | +43.74         | 5'-TATCA TGCC TTTTG CACCA-3'      | 5'-AGCAG AATGG TAGCT GGATT G-3' |
| $\beta$ gene exon3                                          | +44.07         | 5'-ATCAG AAAGT GGTGG CTGGT-3'     | 5'-GATGC TCAAG GCCCT TCATA-3'   |
| $\beta$ gene 3' ~0.5 kb                                     | +44.56         | 5'-CCCAT TTGCT TATCC TGCAT-3'     | 5'-GAAAC CATCT CGCCG TAAAA-3'   |
| 3'HS1-5' ~11 kb                                             | +54.07         | 5'-TTCAG GCCTT GCTCA ACTCT-3'     | 5'-TCTAG GCTTG GCTCC TGTTT-3'   |
| $\beta$ -globin 3'HS1                                       | +64.89         | 5'-TCTTC AGCCA TCCCA AGACT-3'     | 5'-TGGTC TTTTC TGGAC ACCAC-3'   |
| HOR 3' $\beta$ 1 gene                                       | +69.81         | 5'-AGGAT CTTCT CCGCT TAGCC-3'     | 5'-GATGT GGGAG ATGCA GGTCT-3'   |
| <b>Mouse genes used for internal control</b>                |                |                                   |                                 |
| mouse $\beta$ -maj gene                                     |                | 5'-GTCAT CACCG AAGCC TGATT-3'     | 5'-TGTCT GTTTC TGGGG TTGTG-3'   |
| Mouse GAPDH gene                                            |                | 5'-CGTCC CGTAG AAAAA ATGGT-3'     | 5'-GAATT TGCCG TGAGT GGAGT-3'   |
| Mouse $\beta$ -actin gene                                   |                | 5'-CCCTG AAGTA CCCCC TTGAA-3'     | 5'-CTTTT CACGG TTGGC CTTAG-3'   |
| Mouse Aire gene                                             |                | 5'-CACAC AGGCA ATTTG TCCAC-3'     | 5'-AGAGG AAGCG GAAAA GTTGT-3'   |
| Mouse PC gene                                               |                | 5'-TGGAA CTCAA CACTC CGTTG-3'     | 5'-AATGC ACTGC CAGAC ACAAG-3'   |

\*The cap site of the  $\epsilon$ -globin gene set as 1.
